# Supplementary material for: Can facts trump unconditional trust? Evidence-based information halves the influence of physicians’ non-evidence-based cancer screening recommendations
Source: PubMed Central journal article supplement (PMC5568103; doi:10.1371/journal.pone.0183024), 2017-08-23

## S1\_Respondents

### Respondent flow chart

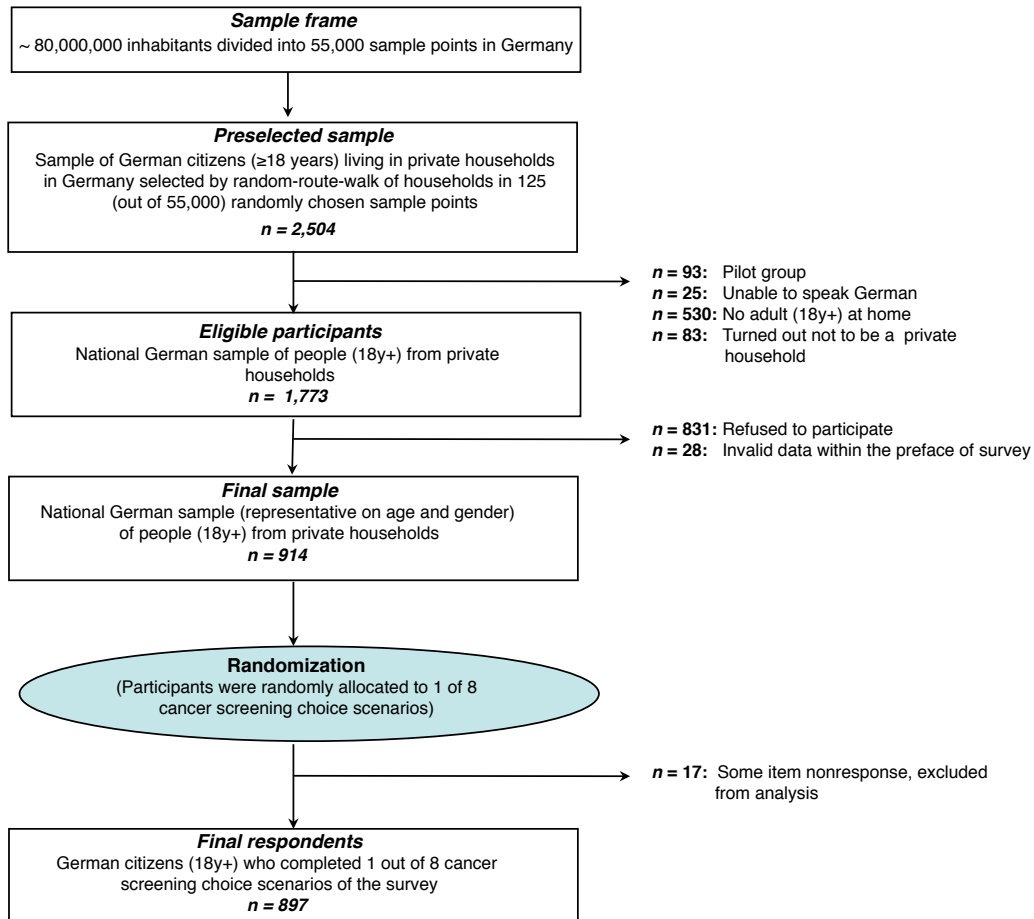

Supplement: pone.0183024.s001.pdf [file pone.0183024.s001.pdf]
